# Supplementary material for: Interactions between DMPC Model Membranes, the Drug Naproxen, and the Saponin β-Aescin
Source: MDPI journal article supplement (doi:10.3390/pharmaceutics15020379), 2023-01-22
Supplement: s1 [file s1]

# Supplementary Materials: Interactions between DMPC model membranes, the drug naproxen, and the saponin $\beta$ -aescin

Pia Hägerbäumer<sup>1</sup> , Friederike Gräbitz-Bräuer<sup>1</sup> , Marco Annegarn<sup>1</sup> , Carina Dargel<sup>1,2</sup> , Tim Julian Stank<sup>1</sup> , Thomas Bizien<sup>3</sup> , and Thomas Hellweg<sup>1,\*</sup> 

## 1. WAXS

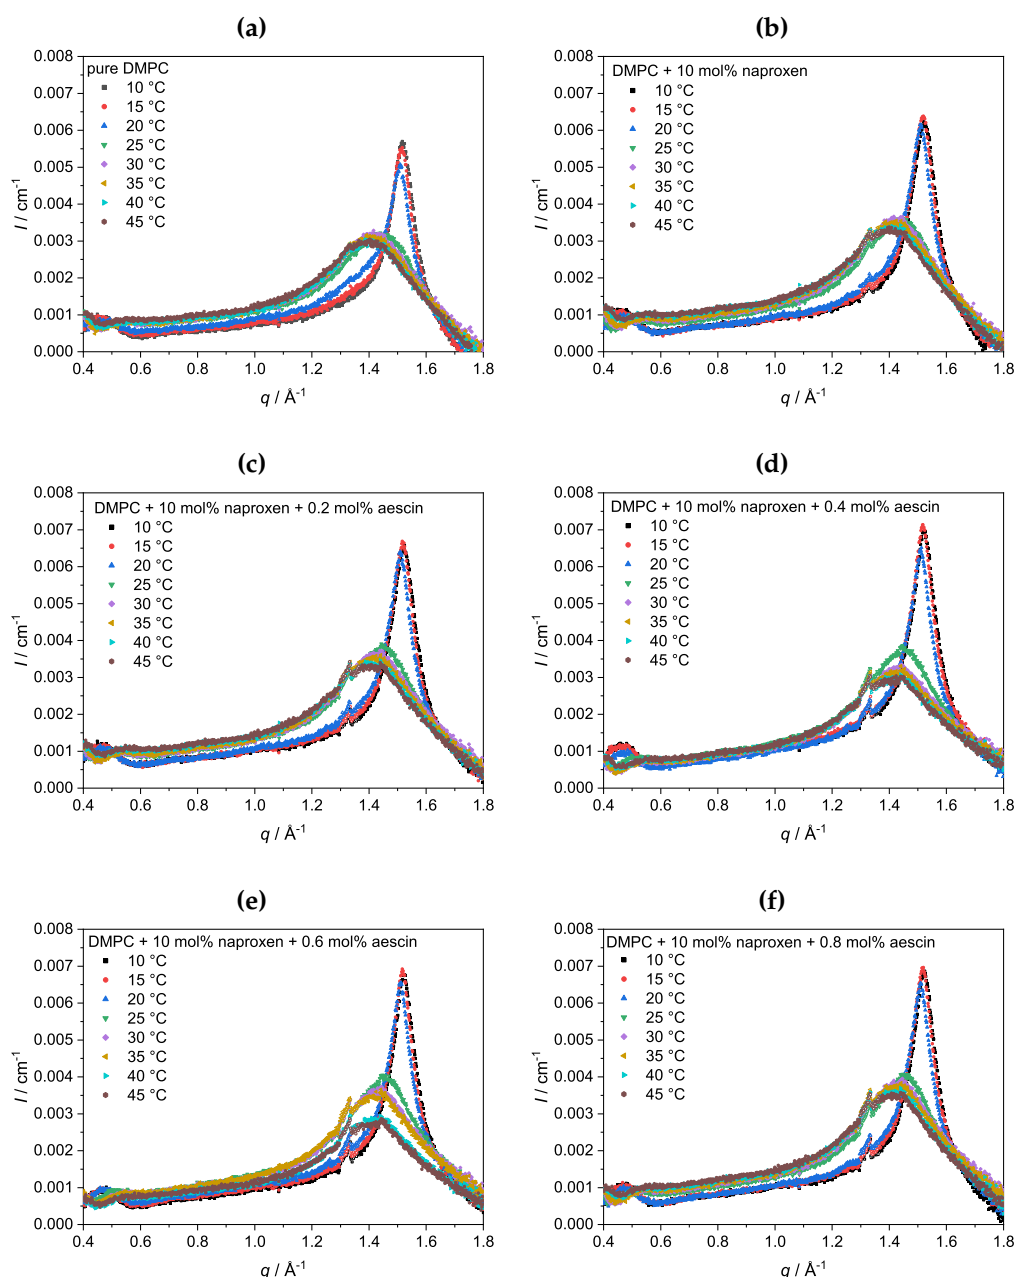

**Figure S1.** Temperature-dependent WAXS-curves for (a) pure DMPC, (b) DMPC with 10 mol% naproxen and (c) - (f) different amounts of aescin, ranging from 0.2 mol% to 0.8 mol%. The open circles mark artifacts that are not considered for evaluation.

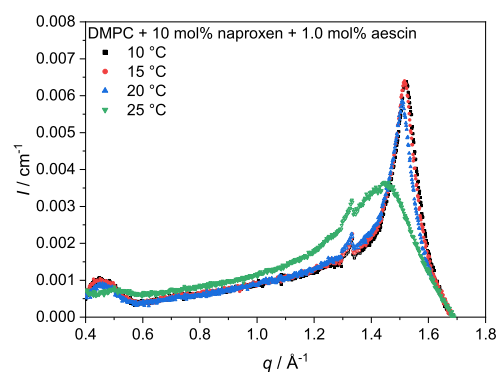

**Figure S2.** Temperature-dependent WAXS-curves for DMPC vesicles with 10 mol% naproxen and 1.0 mol% aescin. The open circles mark artifacts that are not considered for evaluation.

## 2. SAXS

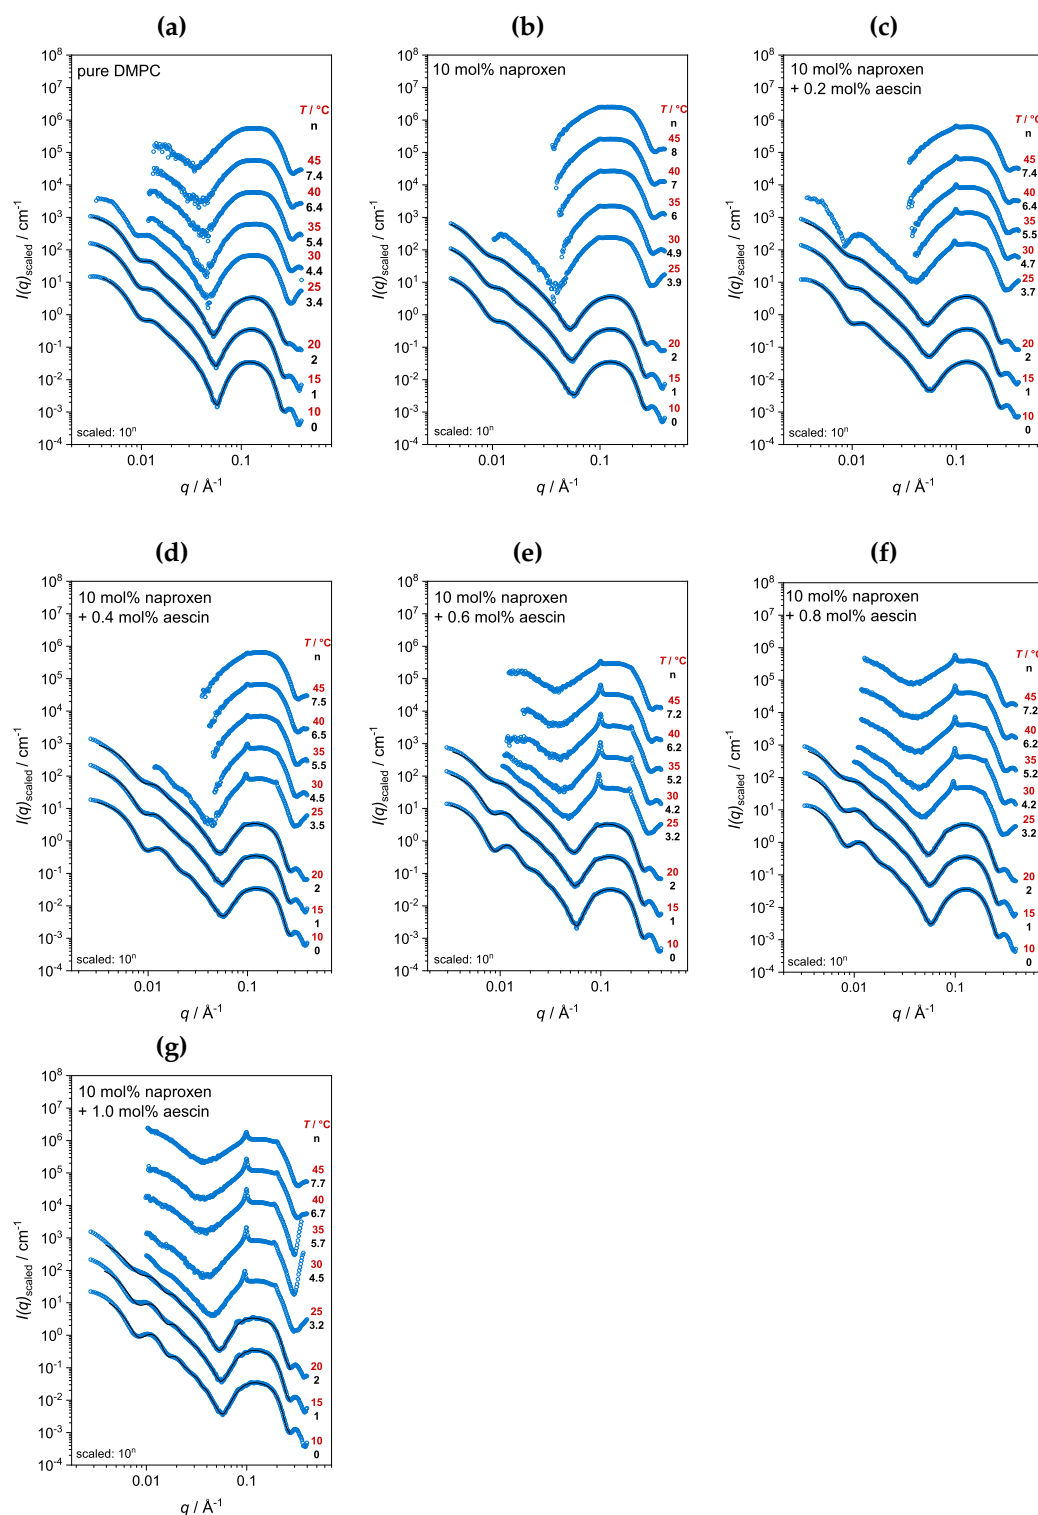

**Figure S3.** Temperature-dependent SAXS-curves for (a) pure DMPC, (b) DMPC with 10 mol% naproxen and (c) - (f) different amounts of aescin, ranging from 0.2 mol% to 1.0 mol%. Curves are scaled by multiples of 10. Solid lines are IFT approximations.

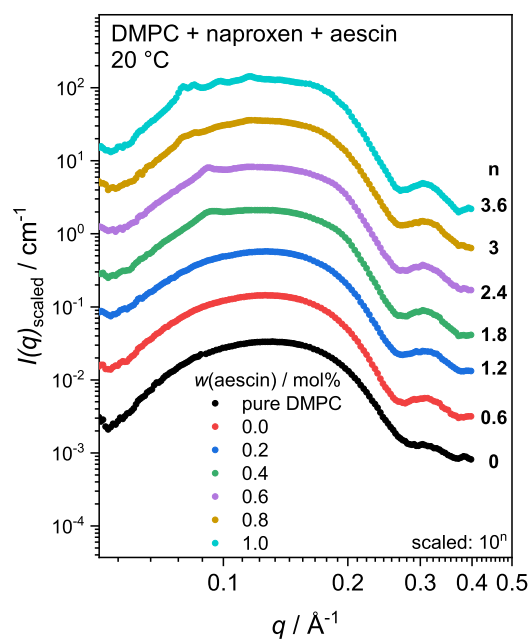

**Figure S4.** SAXS-curves of DMPC vesicles with 10 mol% naproxen and varying amounts of aescin at  $T = 20\text{ °C}$ . Scattering curves are scaled by powers of 10 for better visibility.

## 3. PCS

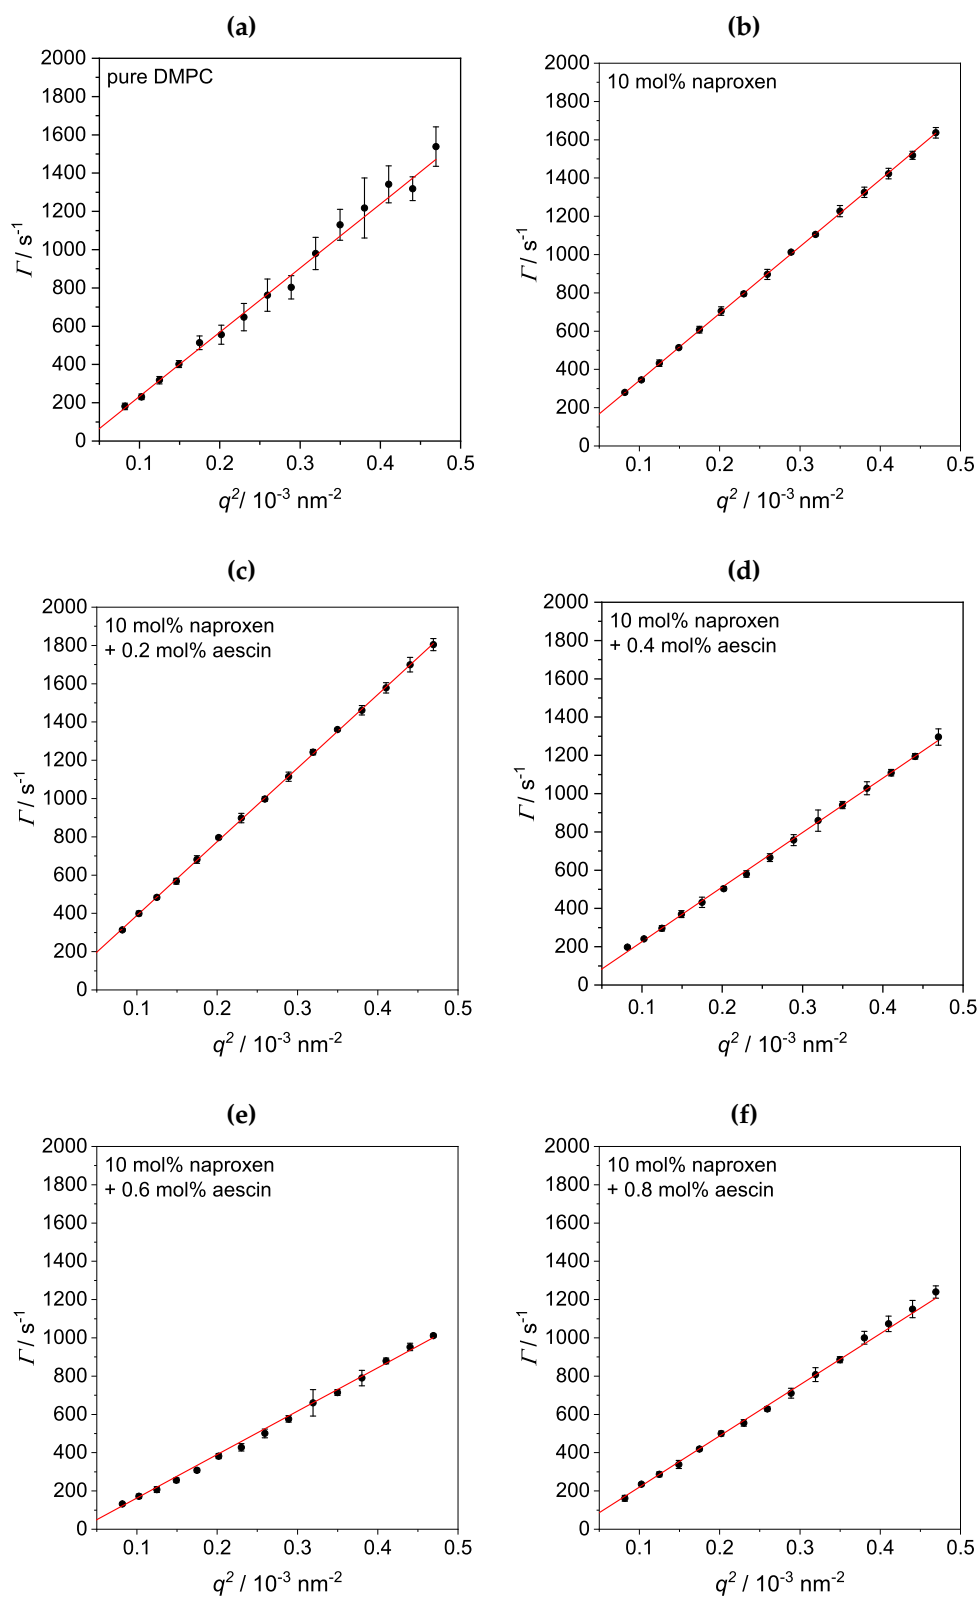

**Figure S5.**  $\Gamma$  plotted against  $q^2$  measured by angle-dependent PCS at  $T = 10^\circ\text{C}$  for (a) pure DMPC, (b) DMPC with 10 mol% naproxen and (c) - (f) different amounts of aescin, ranging from 0.2 mol% to 0.8 mol%. Red lines are linear fits to determine  $D_T$ .

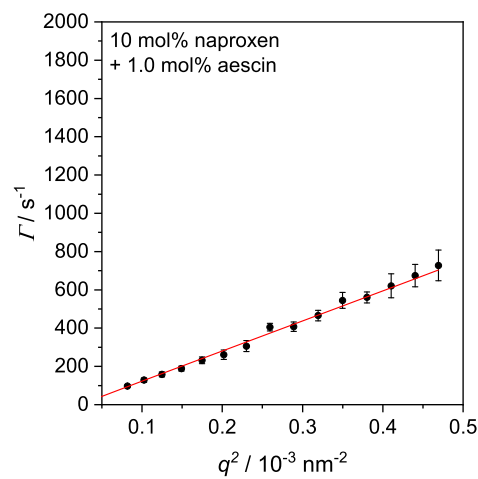

**Figure S6.**  $\Gamma$  plotted against  $q^2$  measured by angle-dependent PCS at  $T = 10^\circ\text{C}$  for DMPC with 10 mol% naproxen and 1.0 mol% aescin. Red lines are linear fits to determine  $D_T$ .

**Table S1.** Hydrodynamic radius  $R_H$  and polydispersity index PDI obtained from contin evaluation of PCS data in dependence on the aescin amount  $w(\text{aescin})$ . Data was recorded at  $T = 10^\circ\text{C}$ .

| $w(\text{aescin}) / \text{mol\%}$ | $R_H / \text{\AA}$ | PDI  |
|-----------------------------------|--------------------|------|
| pure DMPC                         | $474 \pm 24$       | 0.29 |
| 0.0                               | $456 \pm 23$       | 0.06 |
| 0.2                               | $413 \pm 21$       | 0.09 |
| 0.4                               | $557 \pm 28$       | 0.31 |
| 0.6                               | $701 \pm 35$       | 0.35 |
| 0.8                               | $594 \pm 30$       | 0.28 |
| 1.0                               | $1010 \pm 50$      | 0.33 |

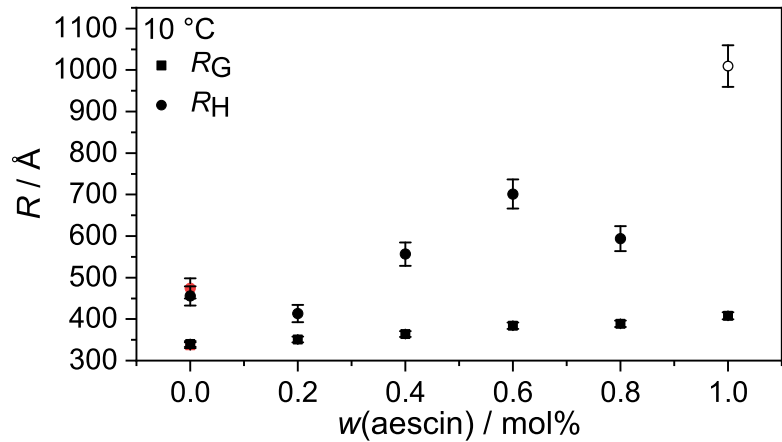

**Figure S7.** Comparison of  $R_G$  and  $R_H$  values, both measured at  $T = 10^\circ\text{C}$  and in dependence on  $w(\text{aescin})$ . The red symbols mark the values for pure DMPC vesicles.
